# Supplementary material
Source: publisher site journal article supplement (https://www.dovepress.com/article/341919)
Supplement: Supplementary file 1 [file get_supplementary_file.php]

**Supplementary Material** Algorithms utilized to identify Comorbidities in SD

| **Algorithm Name** | **Criteria** | **Alternate Criteria 1** |
| --- | --- | --- |
| Atrial Fibrillation | 4 or more of the following: "afib","a fib","atrial-fib","atrial fib","a flutter","atrial flutter","atrial-flutter" in the Problem List "afib","a fib","atrial-fib","atrial fib","a flutter","atrial flutter","atrial-flutter" non-negated, non-family in other Clinical Documents |  |
| Afib Flutter (legacy) | 1 or more ICD Codes: 427.3* AND 1 or more Problem List: "afib", "atrial fib", "a fib", "flut" | Unknown/Unsure: ICD Codes: 427.3* OR "afib", "atrial fib", "a fib", "flut" in problem list |
| CABG | 1 or more CPT Codes: 33510-33514, 33516-33519, 33521-33523, 33533-33536 |  |
| Cardiac Resynchronization Therapy (CRT) | 1 or more CPT Codes: 33224, 33225, 33226 |  |
| Chronic Kidney Disease | 1 or more ICD Codes: 585.* |  |
| Chronic Obstructive Pulmonary Disorder | 2 or more ICD Codes: 491, 491.0, 491.1, 491.2, 491.20, 491.21, 491.22, 491.8, 491.9, 492, 492.0, 492.8, 496, 496.0 AND 1 or more meds: "roflumilast","daliresp","tiotropium","spiriva","ipratropium","atrovent","theophylline","slo-bid","slo-phyllin","theo-dur","theo 24","theo24","theo-24","uniphyl","salmeterol","serevent","formoterol","foradil","albuterol + ipratropium","albuterol / ipratropium","ipratropium bromide / albuterol sulfate","ipratropium bromide with albuterol sulfate","combivent","duoneb","albuterol","proventil","proair","ventolin","fluticasone","salmeterol","advair","budesonide/formoterol","budesonide / formoterol","budesonide - formoterol","budesonide-formoterol","mometasone/formoterol","mometasone / formoterol","dulera","beclomethaosne","qvar","budesonide","pulmicort","fluticasone","flovent","mometasone","asmanex" |  |
| Coronary Artery Disease | 2 or more ICD Codes: 410.*, 411.*, 412.*, 413.*, 414.*, V45.82 OR 1 or more CPT Codes: 33534-33536, 33510-33523, 92980-92982, 92984, 92995, 92996 |  |
| Defibrillator | 1 or more CPT codes: 33249, 33216, 33217, 33270 |  |
| Diabetes | 1 or more ICD Codes: 250.* AND 1 or more Problem List: "dm", "diabetes" | Unknown/Unsure: 1 or more ICD Codes: 250.* OR 1 or more Problem List: "dm", "diabetes" |
| Diabetes (EMERGE) | SEE https://phekb.org/phenotype/type-2-diabetes-demonstration-project |  |
| Dyslipidemia, mixed | 1 or more HDL < 40 (50 for female) OR 1 or more LDL > 160 OR 1 or more Trigs > 150 OR  1 or more Cholesterol > 240 OR 1 or more of the following medications: "atorvastatin","lipitor","torvast","lovastatin","altocor","pravastatin","pravachol","rosuvastatin","crestor","simvastatin","zocor","cholestyramine","prevalite","colestopil","colestid","colesevelam","welchol","niacin","niacor","niaspan","gemfibrozil","lopid","fenofibrate","tricor","fibrocor","bezafibrate","bezalip","ezetimibe","zetia" |  |
| Myocardial Infarction (legacy) | 1 or more ICD Codes: 410.* |  |
| Myocardial Infarction | Described here: https://www.ncbi.nlm.nih.gov/pmc/articles/PMC4333709/ |  |
| Pacemaker | 1 or more ICD Codes: 37.7, 37.8, V45.01 OR 1 or more CPT Codes: 00530, 33206, 33207, 33208, 33210, 33212, 33213, 33214, 33215, 33216, 33217, 33218, 33220, 33222, 33233, 33234, 33235, 33236, 33237, 71090, 93279, 93280, 93281, 93286, 93288, 93293, 93294, 93296, 93724 |  |
| Percutaneous Coronary Intervention | 1 or more CPT Codes: 92980, 92981 OR 1 or more Problem List: "PCI", "stent", "BMS to" |  |
| Peripheral Artery Disease | 1 or more ICD Codes: 442.20, 442.21, 442.22, 442.23, 442.24, 442.25, 442.26, 442.27, 442.28, 442.29 |  |
| Stable Angina | 1 inpatient or 2 outpatient ICD codes: 413.9, 413.0, 413.1, I20.1, I20.8, I20.9 |  |
| Unstable Angina | 1 or more ICD Code: 411, 411.* |  |
| Stroke | 1 or more ICD Codes: 433.01, 433.11, 433.21, 433.31, 433.81, 433.91, 434.11, 434.91 |  |
| TIA | 1 or more ICD Codes:   - ICD9: 435, 435.0, 435.1, 435.2, 435.3, 435.8, 435.9, V12.54 - ICD10: G45.0, G45.1, G45.2, G45.8, G45.9, G46.0, G46.1, G46.2, I67.841, I67.848, M47.02, Z86.73 |  |
| Valve Disease | 1 or more echos with: severe aortic stenosis 1 or more echos with: severe tricuspid regurgitation 1 or more echos with: severe mitral regurgitation 1 or more echos with: mitral stenosis  Based on reader assessment of severity, not on quantitative values |  |
